# Supplementary material
Source: Springer Nature journal article supplement (https://www.springermedizin.de/resource/supplementary/12995_2013_262_MOESM1_ESM.pdf/9623028)
Supplement: MOESM1 [file 9623028]

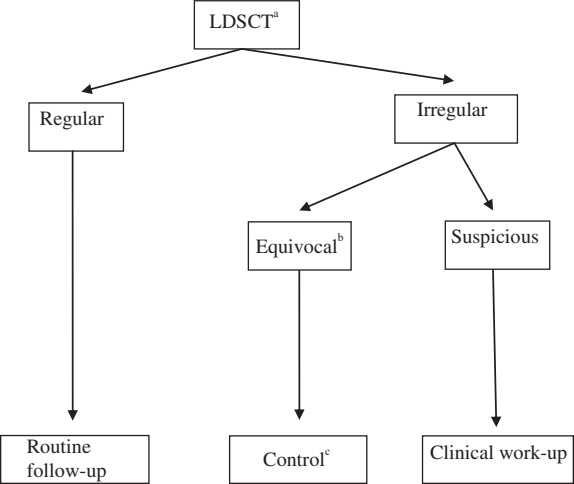

LDSCT<sup>a</sup>

Regular

Irregular

Equivocal<sup>b</sup>

Suspicious

Routine  
follow-up

Control<sup>c</sup>

Clinical work-up
